# Supplementary material for: Comparisons of zinc with cadmium in N2S2coordination and as S-bonded adducts to tungsten carbonyls
Source: Royal Society of Chemistry journal article supplement (doi:10.1039/c1dt11336d), 2011-11-16
Supplement: c1dt11336d.pdf [file c1dt11336d.pdf]

# Supporting Information for

## Comparisons of Zinc with Cadmium in N<sub>2</sub>S<sub>2</sub> Coordination and as S-Bonded Adducts to Tungsten Carbonyls

Jason A. Denny,<sup>a</sup> William S. Foley,<sup>a</sup> Elky Almaraz,<sup>a</sup> Joseph H. Reibenspies,<sup>a</sup> Nattamai Bhuvanesh<sup>a</sup>  
and Marcetta Y. Darensbourg<sup>\*a</sup>

| Table of Contents                                                                                                                                                                                                                                                                          | Page Number |
|--------------------------------------------------------------------------------------------------------------------------------------------------------------------------------------------------------------------------------------------------------------------------------------------|-------------|
| Figure S1. Thermal ellipsoid plot at 50% probability for [Cd-1'] <sub>x</sub> .....                                                                                                                                                                                                        | S3          |
| Figure S2. Thermal ellipsoid plot at 50% probability for monomeric unit of [Cd-1'-W(CO) <sub>5</sub> ] <sub>2</sub><br>.....                                                                                                                                                               | S3          |
| Figure S3. Thermal ellipsoid plot at 50% probability for dimeric [Cd-1'-W(CO) <sub>5</sub> ] <sub>2</sub> .....                                                                                                                                                                            | S4          |
| Table S1. Crystal data and structure refinement for [Cd-1'] <sub>x</sub> .....                                                                                                                                                                                                             | S5          |
| Table S2. Atomic coordinates ( x 10 <sup>4</sup> ) and equivalent isotropic displacement parameters (Å <sup>2</sup> x<br>10 <sup>3</sup> ) for [Cd-1'] <sub>x</sub> . U(eq) is defined as one third of the trace of the orthogonalized U <sup>ij</sup> tensor<br>.....                     | S6          |
| Table S3. Bond lengths [Å] and angles [°] for [Cd-1'] <sub>x</sub> .....                                                                                                                                                                                                                   | S7          |
| Table S4. Anisotropic displacement parameters (Å <sup>2</sup> x 10 <sup>3</sup> ) for [Cd-1'] <sub>x</sub> . The anisotropic<br>displacement factor exponent takes the form: -2π <sup>2</sup> [ h <sup>2</sup> a* <sup>2</sup> U <sup>11</sup> + ... + 2 h k a* b* U <sup>12</sup> ],..... | S11         |
| Table S5. Hydrogen coordinates ( x 10 <sup>4</sup> ) and isotropic displacement parameters (Å <sup>2</sup> x 10 <sup>3</sup> ) for<br>[Cd-1'] <sub>x</sub> .....                                                                                                                           | S12         |
| Table S6. Crystal data and structure refinement for [Cd-1'-W(CO) <sub>5</sub> ] <sub>2</sub> .....                                                                                                                                                                                         | S13         |
| Table S7. Atomic coordinates ( x 10 <sup>4</sup> ) and equivalent isotropic displacement parameters (Å <sup>2</sup> x<br>10 <sup>3</sup> ) for [Cd-1'-W(CO) <sub>5</sub> ] <sub>2</sub> . U(eq) is defined as one third of the trace of the orthogonalized U <sup>ij</sup><br>tensor.....  | S14         |
| Table S8. Bond lengths [Å] and angles [°] for [Cd-1'-W(CO) <sub>5</sub> ] <sub>2</sub> .....                                                                                                                                                                                               | S15         |

Table S9. Anisotropic displacement parameters ( $\text{\AA}^2 \times 10^3$ ) for **[Cd-1'-W(CO)<sub>5</sub>]<sub>2</sub>**. The anisotropic displacement factor exponent takes the form:  $-2\pi^2 [h^2 a^{*2} U^{11} + \dots + 2 h k a^* b^* U^{12}]$ ..... S20

Table S10. Hydrogen coordinates ( $\times 10^4$ ) and isotropic displacement parameters ( $\text{\AA}^2 \times 10^3$ ) for **[Cd-1'-W(CO)<sub>5</sub>]<sub>2</sub>**..... S21

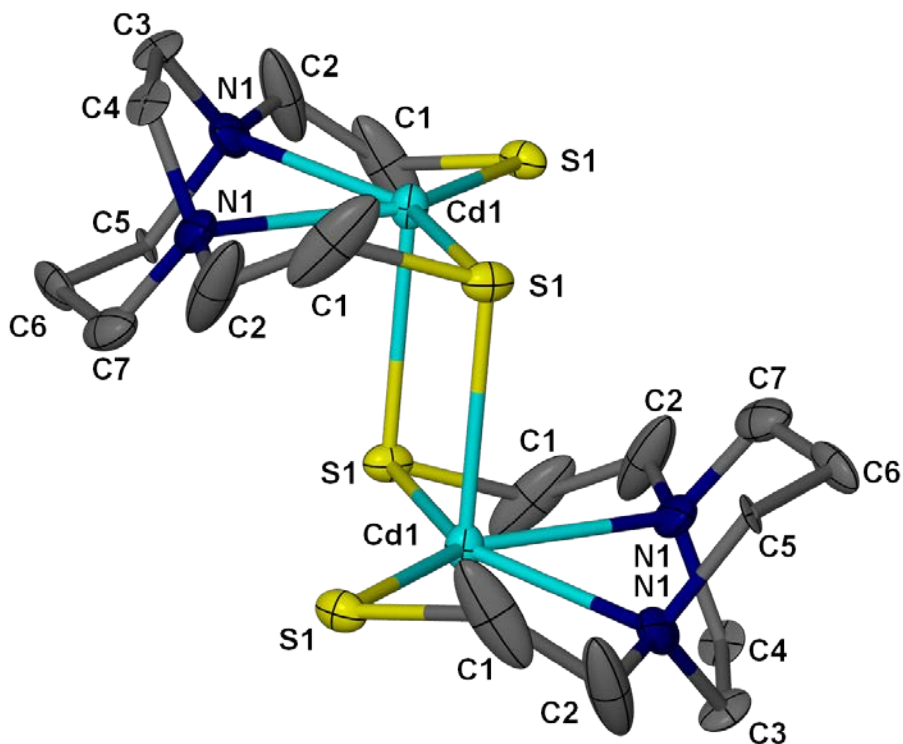

**Figure S1.** Thermal ellipsoid plot at 50% probability for [Cd-1']x.

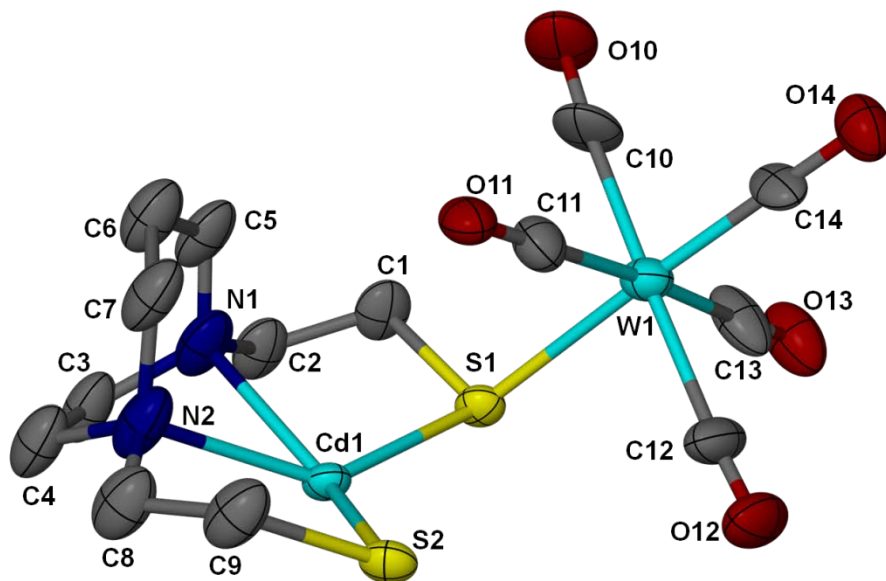

**Figure S2.** Thermal ellipsoid plot at 50% probability for monomeric unit of [Cd-1'-W(CO)<sub>5</sub>]<sub>2</sub>.

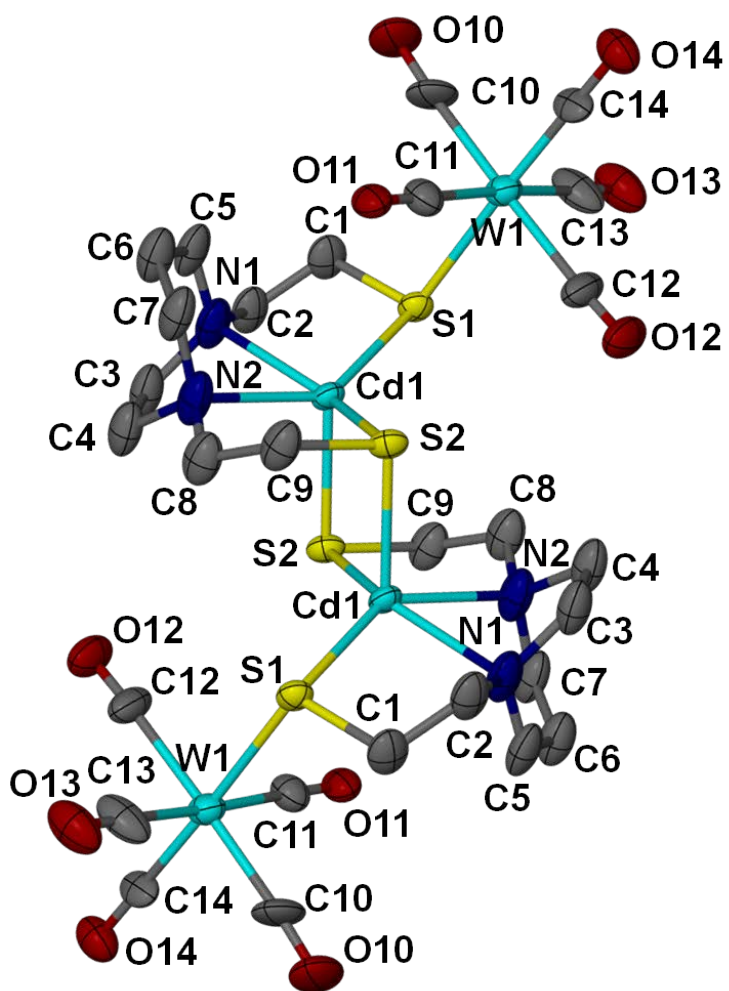

**Figure S3.** Thermal ellipsoid plot at 50% probability for dimeric [Cd-1'-W(CO)<sub>5</sub>]<sub>2</sub>.

**Table S1.** Crystal data and structure refinement for [Cd-1']<sub>x</sub>.

|                                   |                                                                 |                   |
|-----------------------------------|-----------------------------------------------------------------|-------------------|
| Identification code               | [Cd-1'] <sub>x</sub>                                            |                   |
| Empirical formula                 | C <sub>9</sub> H <sub>18</sub> Cd N <sub>2</sub> S <sub>2</sub> |                   |
| Formula weight                    | 330.77                                                          |                   |
| Temperature                       | 110(2) K                                                        |                   |
| Wavelength                        | 1.54184 Å                                                       |                   |
| Crystal system                    | Monoclinic                                                      |                   |
| Space group                       | C2/c                                                            |                   |
| Unit cell dimensions              | a = 14.690(5) Å                                                 | α = 90°.          |
|                                   | b = 11.059(3) Å                                                 | β = 110.033(15)°. |
|                                   | c = 7.516(2) Å                                                  | γ = 90°.          |
| Volume                            | 1147.1(6) Å <sup>3</sup>                                        |                   |
| Z                                 | 4                                                               |                   |
| Density (calculated)              | 1.915 Mg/m <sup>3</sup>                                         |                   |
| Absorption coefficient            | 18.344 mm <sup>-1</sup>                                         |                   |
| F(000)                            | 664                                                             |                   |
| Crystal size                      | 0.20 x 0.01 x 0.01 mm <sup>3</sup>                              |                   |
| Theta range for data collection   | 7.20 to 59.83°.                                                 |                   |
| Index ranges                      | -16 ≤ h ≤ 15, -12 ≤ k ≤ 12, -7 ≤ l ≤ 8                          |                   |
| Reflections collected             | 3023                                                            |                   |
| Independent reflections           | 656 [R(int) = 0.0498]                                           |                   |
| Completeness to theta = 59.83°    | 76.9 %                                                          |                   |
| Absorption correction             | Semi-empirical from equivalents                                 |                   |
| Max. and min. transmission        | 0.8378 and 0.1205                                               |                   |
| Refinement method                 | Full-matrix least-squares on F <sup>2</sup>                     |                   |
| Data / restraints / parameters    | 656 / 16 / 87                                                   |                   |
| Goodness-of-fit on F <sup>2</sup> | 1.012                                                           |                   |
| Final R indices [I > 2σ(I)]       | R1 = 0.0253, wR2 = 0.0491                                       |                   |
| R indices (all data)              | R1 = 0.0346, wR2 = 0.0505                                       |                   |
| Largest diff. peak and hole       | 0.529 and -0.420 e.Å <sup>-3</sup>                              |                   |

**Table S2.** Atomic coordinates ( $\times 10^4$ ) and equivalent isotropic displacement parameters ( $\text{\AA}^2 \times 10^3$ ) for  $[\text{Cd-1}]_x$ .  $U(\text{eq})$  is defined as one third of the trace of the orthogonalized  $U^{ij}$  tensor.

|       | x        | y        | z        | U(eq) |
|-------|----------|----------|----------|-------|
| Cd(1) | 0        | 496(1)   | 2500     | 19(1) |
| S(1)  | -1284(1) | -437(1)  | 3685(2)  | 23(1) |
| N(1)  | -653(3)  | 2400(3)  | 3382(6)  | 29(1) |
| C(1)  | -1957(5) | 963(6)   | 3470(12) | 70(3) |
| C(2)  | -1366(6) | 2038(5)  | 4264(12) | 69(3) |
| C(3)  | 306(8)   | 3099(10) | 4388(18) | 23(3) |
| C(4)  | 1052(10) | 2990(20) | 3400(30) | 24(5) |
| C(5)  | -1238(9) | 3110(16) | 1570(20) | 10(4) |
| C(6)  | -616(7)  | 3827(10) | 695(16)  | 28(3) |
| C(7)  | 102(10)  | 3119(9)  | 55(18)   | 33(3) |

**Table S3.** Bond lengths [Å] and angles [°] for [Cd-1']<sub>x</sub>.

---

|              |            |
|--------------|------------|
| Cd(1)-N(1)#1 | 2.496(4)   |
| Cd(1)-N(1)   | 2.496(4)   |
| Cd(1)-S(1)   | 2.5620(12) |
| Cd(1)-S(1)#1 | 2.5620(12) |
| Cd(1)-S(1)#2 | 2.8417(14) |
| Cd(1)-S(1)#3 | 2.8417(14) |
| S(1)-C(1)    | 1.815(6)   |
| S(1)-Cd(1)#3 | 2.8417(14) |
| N(1)-C(7)#1  | 1.420(13)  |
| N(1)-C(4)#1  | 1.425(18)  |
| N(1)-C(2)    | 1.474(8)   |
| N(1)-C(5)    | 1.551(11)  |
| N(1)-C(3)    | 1.557(11)  |
| C(1)-C(2)    | 1.472(10)  |
| C(1)-H(1A)   | 0.9900     |
| C(1)-H(1B)   | 0.9900     |
| C(2)-H(2A)   | 0.9900     |
| C(2)-H(2B)   | 0.9900     |
| C(3)-C(4)    | 1.522(10)  |
| C(3)-H(3A)   | 0.9900     |
| C(3)-H(3B)   | 0.9900     |
| C(4)-N(1)#1  | 1.425(18)  |
| C(4)-H(4A)   | 0.9900     |
| C(4)-H(4B)   | 0.9900     |
| C(5)-C(6)    | 1.520(10)  |
| C(5)-H(5A)   | 0.9900     |
| C(5)-H(5B)   | 0.9900     |
| C(6)-C(7)    | 1.517(10)  |
| C(6)-H(6A)   | 0.9900     |
| C(6)-H(6B)   | 0.9900     |
| C(7)-N(1)#1  | 1.420(13)  |
| C(7)-H(7A)   | 0.9900     |
| C(7)-H(7B)   | 0.9900     |

|                     |            |
|---------------------|------------|
| N(1)#1-Cd(1)-N(1)   | 64.9(2)    |
| N(1)#1-Cd(1)-S(1)   | 145.87(11) |
| N(1)-Cd(1)-S(1)     | 81.48(11)  |
| N(1)#1-Cd(1)-S(1)#1 | 81.48(11)  |
| N(1)-Cd(1)-S(1)#1   | 145.87(11) |
| S(1)-Cd(1)-S(1)#1   | 132.50(5)  |
| N(1)#1-Cd(1)-S(1)#2 | 86.21(10)  |
| N(1)-Cd(1)-S(1)#2   | 96.02(10)  |
| S(1)-Cd(1)-S(1)#2   | 91.64(4)   |
| S(1)#1-Cd(1)-S(1)#2 | 87.30(4)   |
| N(1)#1-Cd(1)-S(1)#3 | 96.02(10)  |
| N(1)-Cd(1)-S(1)#3   | 86.21(10)  |
| S(1)-Cd(1)-S(1)#3   | 87.30(4)   |
| S(1)#1-Cd(1)-S(1)#3 | 91.64(4)   |
| S(1)#2-Cd(1)-S(1)#3 | 177.37(5)  |
| C(1)-S(1)-Cd(1)     | 93.97(19)  |
| C(1)-S(1)-Cd(1)#3   | 105.2(3)   |
| Cd(1)-S(1)-Cd(1)#3  | 92.70(4)   |
| C(7)#1-N(1)-C(4)#1  | 117.2(11)  |
| C(7)#1-N(1)-C(2)    | 94.2(7)    |
| C(4)#1-N(1)-C(2)    | 114.9(6)   |
| C(7)#1-N(1)-C(5)    | 115.4(9)   |
| C(4)#1-N(1)-C(5)    | 10.5(9)    |
| C(2)-N(1)-C(5)      | 105.4(6)   |
| C(7)#1-N(1)-C(3)    | 32.4(5)    |
| C(4)#1-N(1)-C(3)    | 104.0(9)   |
| C(2)-N(1)-C(3)      | 125.5(7)   |
| C(5)-N(1)-C(3)      | 108.2(8)   |
| C(7)#1-N(1)-Cd(1)   | 122.0(5)   |
| C(4)#1-N(1)-Cd(1)   | 101.9(9)   |
| C(2)-N(1)-Cd(1)     | 106.7(3)   |
| C(5)-N(1)-Cd(1)     | 110.0(8)   |
| C(3)-N(1)-Cd(1)     | 100.5(5)   |
| C(2)-C(1)-S(1)      | 115.1(5)   |
| C(2)-C(1)-H(1A)     | 108.5      |
| S(1)-C(1)-H(1A)     | 108.5      |



|                   |           |
|-------------------|-----------|
| C(2)-C(1)-H(1B)   | 108.5     |
| S(1)-C(1)-H(1B)   | 108.5     |
| H(1A)-C(1)-H(1B)  | 107.5     |
| C(1)-C(2)-N(1)    | 116.6(6)  |
| C(1)-C(2)-H(2A)   | 108.1     |
| N(1)-C(2)-H(2A)   | 108.1     |
| C(1)-C(2)-H(2B)   | 108.1     |
| N(1)-C(2)-H(2B)   | 108.1     |
| H(2A)-C(2)-H(2B)  | 107.3     |
| C(4)-C(3)-N(1)    | 114.0(11) |
| C(4)-C(3)-H(3A)   | 108.8     |
| N(1)-C(3)-H(3A)   | 108.8     |
| C(4)-C(3)-H(3B)   | 108.8     |
| N(1)-C(3)-H(3B)   | 108.8     |
| H(3A)-C(3)-H(3B)  | 107.6     |
| N(1)#1-C(4)-C(3)  | 111.2(12) |
| N(1)#1-C(4)-H(4A) | 109.4     |
| C(3)-C(4)-H(4A)   | 109.4     |
| N(1)#1-C(4)-H(4B) | 109.4     |
| C(3)-C(4)-H(4B)   | 109.4     |
| H(4A)-C(4)-H(4B)  | 108.0     |
| C(6)-C(5)-N(1)    | 114.2(9)  |
| C(6)-C(5)-H(5A)   | 108.7     |
| N(1)-C(5)-H(5A)   | 108.7     |
| C(6)-C(5)-H(5B)   | 108.7     |
| N(1)-C(5)-H(5B)   | 108.7     |
| H(5A)-C(5)-H(5B)  | 107.6     |
| C(7)-C(6)-C(5)    | 117.0(11) |
| C(7)-C(6)-H(6A)   | 108.0     |
| C(5)-C(6)-H(6A)   | 108.0     |
| C(7)-C(6)-H(6B)   | 108.0     |
| C(5)-C(6)-H(6B)   | 108.0     |
| H(6A)-C(6)-H(6B)  | 107.3     |
| N(1)#1-C(7)-C(6)  | 106.8(10) |
| N(1)#1-C(7)-H(7A) | 110.4     |
| C(6)-C(7)-H(7A)   | 110.4     |

|                   |       |
|-------------------|-------|
| N(1)#1-C(7)-H(7B) | 110.4 |
| C(6)-C(7)-H(7B)   | 110.4 |
| H(7A)-C(7)-H(7B)  | 108.6 |

---

Symmetry transformations used to generate equivalent atoms:

#1 -x,y,-z+1/2 #2 x,-y,z-1/2 #3 -x,-y,-z+1

**Table S4.** Anisotropic displacement parameters ( $\text{\AA}^2 \times 10^3$ ) for  $[\text{Cd-1}']_x$ . The anisotropic displacement factor exponent takes the form:  $-2\pi^2 [ h^2 a^* U_{11} + \dots + 2 h k a^* b^* U_{12} ]$

|       | U11    | U22   | U33    | U23    | U13   | U12    |
|-------|--------|-------|--------|--------|-------|--------|
| Cd(1) | 18(1)  | 18(1) | 25(1)  | 0      | 12(1) | 0      |
| S(1)  | 18(1)  | 30(1) | 20(1)  | 3(1)   | 7(1)  | -4(1)  |
| N(1)  | 39(3)  | 22(2) | 24(3)  | 6(2)   | 7(2)  | 14(2)  |
| C(1)  | 50(4)  | 79(5) | 107(7) | 65(4)  | 62(5) | 38(4)  |
| C(2)  | 122(7) | 34(3) | 94(6)  | 33(4)  | 93(5) | 35(4)  |
| C(3)  | 11(7)  | 29(6) | 24(8)  | -11(5) | 0(5)  | -9(6)  |
| C(4)  | 15(6)  | 25(6) | 28(7)  | -6(4)  | 3(4)  | -18(4) |
| C(5)  | 7(5)   | 7(5)  | 15(5)  | 8(3)   | 4(4)  | 6(4)   |
| C(6)  | 23(6)  | 30(6) | 28(7)  | 17(5)  | 3(5)  | -11(5) |
| C(7)  | 35(8)  | 37(6) | 25(8)  | -8(5)  | 8(6)  | -18(6) |

**Table S5.** Hydrogen coordinates ( $\times 10^4$ ) and isotropic displacement parameters ( $\text{\AA}^2 \times 10^3$ ) for  $[\text{Cd-1}']_x$ .

|       | x     | y    | z     | U(eq) |
|-------|-------|------|-------|-------|
| H(1A) | -2319 | 1112 | 2112  | 84    |
| H(1B) | -2439 | 859  | 4111  | 84    |
| H(2A) | -1015 | 1889 | 5627  | 83    |
| H(2B) | -1810 | 2727 | 4172  | 83    |
| H(3A) | 152   | 3964 | 4462  | 27    |
| H(3B) | 595   | 2792 | 5699  | 27    |
| H(4A) | 1280  | 3805 | 3217  | 28    |
| H(4B) | 1617  | 2523 | 4219  | 28    |
| H(5A) | -1639 | 2532 | 620   | 12    |
| H(5B) | -1683 | 3674 | 1891  | 12    |
| H(6A) | -1054 | 4270 | -414  | 34    |
| H(6B) | -251  | 4439 | 1628  | 34    |
| H(7A) | -245  | 2600 | -1041 | 39    |
| H(7B) | 530   | 3678 | -322  | 39    |

**Table S6.** Crystal data and structure refinement for [Cd-1'-W(CO)<sub>5</sub>]<sub>2</sub>.

|                                   |                                                                                   |                   |
|-----------------------------------|-----------------------------------------------------------------------------------|-------------------|
| Identification code               | [Cd-1'-W(CO) <sub>5</sub> ] <sub>2</sub>                                          |                   |
| Empirical formula                 | C <sub>14</sub> H <sub>16</sub> Cd N <sub>2</sub> O <sub>5</sub> S <sub>2</sub> W |                   |
| Formula weight                    | 652.66                                                                            |                   |
| Temperature                       | 110(2) K                                                                          |                   |
| Wavelength                        | 1.54178 Å                                                                         |                   |
| Crystal system                    | Monoclinic                                                                        |                   |
| Space group                       | P2(1)/c                                                                           |                   |
| Unit cell dimensions              | a = 14.574(3) Å                                                                   | α = 90°.          |
|                                   | b = 11.540(3) Å                                                                   | β = 115.686(11)°. |
|                                   | c = 12.711(3) Å                                                                   | γ = 90°.          |
| Volume                            | 1926.5(8) Å <sup>3</sup>                                                          |                   |
| Z                                 | 4                                                                                 |                   |
| Density (calculated)              | 2.250 Mg/m <sup>3</sup>                                                           |                   |
| Absorption coefficient            | 21.983 mm <sup>-1</sup>                                                           |                   |
| F(000)                            | 1232                                                                              |                   |
| Crystal size                      | 0.03 x 0.02 x 0.01 mm <sup>3</sup>                                                |                   |
| Theta range for data collection   | 3.36 to 60.84°.                                                                   |                   |
| Index ranges                      | -15 ≤ h ≤ 16, -12 ≤ k ≤ 13, -14 ≤ l ≤ 14                                          |                   |
| Reflections collected             | 14013                                                                             |                   |
| Independent reflections           | 2868 [R(int) = 0.1997]                                                            |                   |
| Completeness to theta = 60.84°    | 97.9 %                                                                            |                   |
| Absorption correction             | Semi-empirical from equivalents                                                   |                   |
| Max. and min. transmission        | 0.8101 and 0.5584                                                                 |                   |
| Refinement method                 | Full-matrix least-squares on F <sup>2</sup>                                       |                   |
| Data / restraints / parameters    | 2868 / 175 / 226                                                                  |                   |
| Goodness-of-fit on F <sup>2</sup> | 1.070                                                                             |                   |
| Final R indices [I > 2σ(I)]       | R1 = 0.0913, wR2 = 0.2265                                                         |                   |
| R indices (all data)              | R1 = 0.1401, wR2 = 0.2592                                                         |                   |
| Largest diff. peak and hole       | 1.939 and -2.371 e.Å <sup>-3</sup>                                                |                   |

**Table S7.** Atomic coordinates ( $\times 10^4$ ) and equivalent isotropic displacement parameters ( $\text{\AA}^2 \times 10^3$ ) for  $[\text{Cd-1}'\text{-W}(\text{CO})_5]_2$ .  $U(\text{eq})$  is defined as one third of the trace of the orthogonalized  $U^{ij}$  tensor.

|       | x         | y         | z         | U(eq) |
|-------|-----------|-----------|-----------|-------|
| Cd(1) | 6287(1)   | 4988(2)   | 259(2)    | 28(1) |
| S(1)  | 7688(4)   | 6265(6)   | 1673(5)   | 30(1) |
| S(2)  | 4680(4)   | 5874(6)   | -1375(5)  | 30(1) |
| N(1)  | 7684(18)  | 3690(20)  | 640(20)   | 51(3) |
| N(2)  | 5945(19)  | 3510(20)  | -1190(20) | 52(3) |
| C(1)  | 8750(20)  | 5220(20)  | 2030(30)  | 46(4) |
| C(2)  | 8410(20)  | 3980(30)  | 1910(30)  | 48(3) |
| C(3)  | 7290(20)  | 2500(30)  | 760(30)   | 54(3) |
| C(4)  | 6270(20)  | 2330(30)  | -490(30)  | 54(3) |
| C(5)  | 8160(20)  | 3840(30)  | -10(30)   | 53(3) |
| C(6)  | 7580(20)  | 3570(30)  | -1160(30) | 56(3) |
| C(7)  | 6460(20)  | 3760(30)  | -1920(30) | 53(3) |
| C(8)  | 4850(20)  | 3540(30)  | -2000(30) | 53(3) |
| C(9)  | 4430(20)  | 4700(30)  | -2490(30) | 49(4) |
| W(1)  | 8017(1)   | 8065(1)   | 679(1)    | 34(1) |
| C(10) | 9380(20)  | 7500(30)  | 830(30)   | 62(5) |
| C(11) | 7330(20)  | 7240(20)  | -900(30)  | 41(4) |
| C(12) | 6600(20)  | 8700(30)  | 520(30)   | 51(4) |
| C(13) | 8670(30)  | 8810(30)  | 2310(30)  | 58(5) |
| C(14) | 8240(20)  | 9430(30)  | -30(20)   | 39(4) |
| O(10) | 10147(16) | 7240(20)  | 870(20)   | 71(5) |
| O(11) | 7010(15)  | 6697(16)  | -1734(16) | 41(4) |
| O(12) | 5867(16)  | 9077(19)  | 344(19)   | 56(5) |
| O(13) | 9012(18)  | 9270(20)  | 3149(18)  | 64(5) |
| O(14) | 8398(17)  | 10280(18) | -431(17)  | 51(4) |

**Table S8.** Bond lengths [ $\text{\AA}$ ] and angles [ $^\circ$ ] for  $[\text{Cd-1}'\text{-W}(\text{CO})_5]_2$ .

---

|              |          |
|--------------|----------|
| Cd(1)-N(2)   | 2.40(2)  |
| Cd(1)-N(1)   | 2.40(2)  |
| Cd(1)-S(1)   | 2.527(6) |
| Cd(1)-S(2)   | 2.574(6) |
| Cd(1)-S(2)#1 | 2.593(6) |
| S(1)-C(1)    | 1.86(3)  |
| S(1)-W(1)    | 2.583(7) |
| S(2)-C(9)    | 1.88(3)  |
| S(2)-Cd(1)#1 | 2.593(6) |
| N(1)-C(5)    | 1.30(4)  |
| N(1)-C(3)    | 1.52(4)  |
| N(1)-C(2)    | 1.54(3)  |
| N(2)-C(7)    | 1.46(4)  |
| N(2)-C(8)    | 1.48(4)  |
| N(2)-C(4)    | 1.58(4)  |
| C(1)-C(2)    | 1.50(4)  |
| C(1)-H(1A)   | 0.9900   |
| C(1)-H(1B)   | 0.9900   |
| C(2)-H(2A)   | 0.9900   |
| C(2)-H(2B)   | 0.9900   |
| C(3)-C(4)    | 1.65(4)  |
| C(3)-H(3A)   | 0.9900   |
| C(3)-H(3B)   | 0.9900   |
| C(4)-H(4A)   | 0.9900   |
| C(4)-H(4B)   | 0.9900   |
| C(5)-C(6)    | 1.37(4)  |
| C(5)-H(5)    | 0.9500   |
| C(6)-C(7)    | 1.51(4)  |
| C(6)-H(6)    | 0.9500   |
| C(7)-H(7A)   | 0.9900   |
| C(7)-H(7B)   | 0.9900   |
| C(8)-C(9)    | 1.49(4)  |
| C(8)-H(8A)   | 0.9900   |
| C(8)-H(8B)   | 0.9900   |

|                    |           |
|--------------------|-----------|
| C(9)-H(9A)         | 0.9900    |
| C(9)-H(9B)         | 0.9900    |
| W(1)-C(14)         | 1.91(3)   |
| W(1)-C(10)         | 2.02(3)   |
| W(1)-C(11)         | 2.05(3)   |
| W(1)-C(13)         | 2.06(3)   |
| W(1)-C(12)         | 2.11(3)   |
| C(10)-O(10)        | 1.13(3)   |
| C(11)-O(11)        | 1.14(3)   |
| C(12)-O(12)        | 1.09(3)   |
| C(13)-O(13)        | 1.10(3)   |
| C(14)-O(14)        | 1.18(3)   |
|                    |           |
| N(2)-Cd(1)-N(1)    | 65.5(8)   |
| N(2)-Cd(1)-S(1)    | 142.7(7)  |
| N(1)-Cd(1)-S(1)    | 82.4(6)   |
| N(2)-Cd(1)-S(2)    | 81.3(6)   |
| N(1)-Cd(1)-S(2)    | 143.6(6)  |
| S(1)-Cd(1)-S(2)    | 121.0(2)  |
| N(2)-Cd(1)-S(2)#1  | 99.5(7)   |
| N(1)-Cd(1)-S(2)#1  | 105.4(7)  |
| S(1)-Cd(1)-S(2)#1  | 107.3(2)  |
| S(2)-Cd(1)-S(2)#1  | 94.2(2)   |
| C(1)-S(1)-Cd(1)    | 97.4(9)   |
| C(1)-S(1)-W(1)     | 109.2(10) |
| Cd(1)-S(1)-W(1)    | 112.6(2)  |
| C(9)-S(2)-Cd(1)    | 97.6(9)   |
| C(9)-S(2)-Cd(1)#1  | 99.5(11)  |
| Cd(1)-S(2)-Cd(1)#1 | 85.8(2)   |
| C(5)-N(1)-C(3)     | 121(3)    |
| C(5)-N(1)-C(2)     | 109(2)    |
| C(3)-N(1)-C(2)     | 102(2)    |
| C(5)-N(1)-Cd(1)    | 115(2)    |
| C(3)-N(1)-Cd(1)    | 105.2(17) |
| C(2)-N(1)-Cd(1)    | 102.1(16) |
| C(7)-N(2)-C(8)     | 104(2)    |



|                  |           |
|------------------|-----------|
| C(7)-N(2)-C(4)   | 115(2)    |
| C(8)-N(2)-C(4)   | 112(3)    |
| C(7)-N(2)-Cd(1)  | 110.9(19) |
| C(8)-N(2)-Cd(1)  | 108.9(17) |
| C(4)-N(2)-Cd(1)  | 105.6(16) |
| C(2)-C(1)-S(1)   | 112.8(19) |
| C(2)-C(1)-H(1A)  | 109.0     |
| S(1)-C(1)-H(1A)  | 109.0     |
| C(2)-C(1)-H(1B)  | 109.0     |
| S(1)-C(1)-H(1B)  | 109.0     |
| H(1A)-C(1)-H(1B) | 107.8     |
| C(1)-C(2)-N(1)   | 112(2)    |
| C(1)-C(2)-H(2A)  | 109.3     |
| N(1)-C(2)-H(2A)  | 109.3     |
| C(1)-C(2)-H(2B)  | 109.3     |
| N(1)-C(2)-H(2B)  | 109.3     |
| H(2A)-C(2)-H(2B) | 108.0     |
| N(1)-C(3)-C(4)   | 103(2)    |
| N(1)-C(3)-H(3A)  | 111.2     |
| C(4)-C(3)-H(3A)  | 111.2     |
| N(1)-C(3)-H(3B)  | 111.2     |
| C(4)-C(3)-H(3B)  | 111.2     |
| H(3A)-C(3)-H(3B) | 109.1     |
| N(2)-C(4)-C(3)   | 112(2)    |
| N(2)-C(4)-H(4A)  | 109.3     |
| C(3)-C(4)-H(4A)  | 109.3     |
| N(2)-C(4)-H(4B)  | 109.3     |
| C(3)-C(4)-H(4B)  | 109.3     |
| H(4A)-C(4)-H(4B) | 108.0     |
| N(1)-C(5)-C(6)   | 113(3)    |
| N(1)-C(5)-H(5)   | 123.4     |
| C(6)-C(5)-H(5)   | 123.4     |
| C(5)-C(6)-C(7)   | 130(3)    |
| C(5)-C(6)-H(6)   | 114.9     |
| C(7)-C(6)-H(6)   | 114.9     |
| N(2)-C(7)-C(6)   | 106(3)    |

|                  |           |
|------------------|-----------|
| N(2)-C(7)-H(7A)  | 110.6     |
| C(6)-C(7)-H(7A)  | 110.6     |
| N(2)-C(7)-H(7B)  | 110.6     |
| C(6)-C(7)-H(7B)  | 110.6     |
| H(7A)-C(7)-H(7B) | 108.7     |
| N(2)-C(8)-C(9)   | 116(3)    |
| N(2)-C(8)-H(8A)  | 108.4     |
| C(9)-C(8)-H(8A)  | 108.4     |
| N(2)-C(8)-H(8B)  | 108.4     |
| C(9)-C(8)-H(8B)  | 108.4     |
| H(8A)-C(8)-H(8B) | 107.4     |
| C(8)-C(9)-S(2)   | 115(2)    |
| C(8)-C(9)-H(9A)  | 108.6     |
| S(2)-C(9)-H(9A)  | 108.6     |
| C(8)-C(9)-H(9B)  | 108.6     |
| S(2)-C(9)-H(9B)  | 108.6     |
| H(9A)-C(9)-H(9B) | 107.5     |
| C(14)-W(1)-C(10) | 87.2(13)  |
| C(14)-W(1)-C(11) | 91.5(11)  |
| C(10)-W(1)-C(11) | 89.1(14)  |
| C(14)-W(1)-C(13) | 92.0(12)  |
| C(10)-W(1)-C(13) | 91.9(15)  |
| C(11)-W(1)-C(13) | 176.3(11) |
| C(14)-W(1)-C(12) | 91.4(12)  |
| C(10)-W(1)-C(12) | 178.5(13) |
| C(11)-W(1)-C(12) | 91.6(13)  |
| C(13)-W(1)-C(12) | 87.5(15)  |
| C(14)-W(1)-S(1)  | 178.0(9)  |
| C(10)-W(1)-S(1)  | 94.4(10)  |
| C(11)-W(1)-S(1)  | 89.6(8)   |
| C(13)-W(1)-S(1)  | 86.8(9)   |
| C(12)-W(1)-S(1)  | 87.0(9)   |
| O(10)-C(10)-W(1) | 175(3)    |
| O(11)-C(11)-W(1) | 174(3)    |
| O(12)-C(12)-W(1) | 174(3)    |
| O(13)-C(13)-W(1) | 175(3)    |

O(14)-C(14)-W(1)      178(2)

---

Symmetry transformations used to generate equivalent atoms:

#1 -x+1,-y+1,-z

**Table S9.** Anisotropic displacement parameters ( $\text{\AA}^2 \times 10^3$ ) for  $[\text{Cd-1}'\text{-W}(\text{CO})_5]_2$ . The anisotropic displacement factor exponent takes the form:  $-2\pi^2 [h^2 a^{*2} U^{11} + \dots + 2 h k a^* b^* U^{12}]$

|       | U11    | U22    | U33     | U23    | U13   | U12     |
|-------|--------|--------|---------|--------|-------|---------|
| Cd(1) | 19(1)  | 33(1)  | 33(1)   | -3(1)  | 13(1) | 1(1)    |
| S(1)  | 19(3)  | 37(3)  | 33(3)   | -3(2)  | 9(2)  | -1(2)   |
| S(2)  | 19(3)  | 42(4)  | 29(3)   | 0(3)   | 9(2)  | -2(2)   |
| N(1)  | 36(4)  | 52(4)  | 55(6)   | -14(4) | 9(4)  | 16(4)   |
| N(2)  | 45(5)  | 55(5)  | 45(5)   | -21(4) | 8(4)  | 12(4)   |
| C(1)  | 27(5)  | 47(5)  | 53(7)   | -2(5)  | 5(5)  | 10(4)   |
| C(2)  | 31(5)  | 48(4)  | 54(6)   | -8(5)  | 7(4)  | 13(4)   |
| C(3)  | 43(5)  | 50(4)  | 55(6)   | -17(5) | 8(5)  | 15(4)   |
| C(4)  | 46(6)  | 52(4)  | 50(6)   | -20(4) | 9(5)  | 12(4)   |
| C(5)  | 39(5)  | 57(6)  | 55(6)   | -16(5) | 11(4) | 20(5)   |
| C(6)  | 45(5)  | 58(6)  | 54(6)   | -16(5) | 10(5) | 15(5)   |
| C(7)  | 46(5)  | 57(6)  | 48(5)   | -22(5) | 11(4) | 12(5)   |
| C(8)  | 45(5)  | 58(5)  | 43(6)   | -18(5) | 7(4)  | 8(5)    |
| C(9)  | 41(7)  | 58(7)  | 39(6)   | -16(5) | 8(5)  | 7(6)    |
| W(1)  | 29(1)  | 40(1)  | 36(1)   | -2(1)  | 17(1) | -2(1)   |
| C(10) | 27(6)  | 67(13) | 101(15) | 5(10)  | 34(7) | -8(7)   |
| C(11) | 48(9)  | 38(10) | 41(5)   | -2(5)  | 22(7) | -8(8)   |
| C(12) | 49(7)  | 47(10) | 73(12)  | 16(8)  | 42(8) | 13(7)   |
| C(13) | 84(12) | 55(10) | 34(6)   | 0(7)   | 23(8) | -31(10) |
| C(14) | 55(11) | 46(8)  | 30(9)   | -13(6) | 30(9) | -14(7)  |
| O(10) | 29(7)  | 73(13) | 112(15) | 1(11)  | 31(8) | 0(8)    |
| O(11) | 49(9)  | 44(10) | 41(7)   | -6(6)  | 30(7) | -9(7)   |
| O(12) | 49(7)  | 52(10) | 78(12)  | 17(9)  | 38(9) | 19(8)   |
| O(13) | 86(12) | 61(11) | 41(7)   | -10(7) | 22(9) | -30(10) |
| O(14) | 67(11) | 42(9)  | 45(10)  | -6(7)  | 25(9) | -14(8)  |

**Table S10.** Hydrogen coordinates ( $\times 10^4$ ) and isotropic displacement parameters ( $\text{\AA}^2 \times 10^3$ ) for  $[\text{Cd-1}'\text{-W}(\text{CO})_5]_2$ .

|       | x    | y    | z     | U(eq) |
|-------|------|------|-------|-------|
| H(1A) | 9084 | 5366 | 1510  | 56    |
| H(1B) | 9265 | 5359 | 2844  | 56    |
| H(2A) | 8063 | 3843 | 2415  | 58    |
| H(2B) | 9014 | 3471 | 2176  | 58    |
| H(3A) | 7115 | 2474 | 1430  | 65    |
| H(3B) | 7805 | 1887 | 868   | 65    |
| H(4A) | 6413 | 1750 | -972  | 65    |
| H(4B) | 5702 | 2040 | -337  | 65    |
| H(5)  | 8841 | 4106 | 282   | 64    |
| H(6)  | 7939 | 3195 | -1534 | 67    |
| H(7A) | 6340 | 4576 | -2200 | 64    |
| H(7B) | 6218 | 3242 | -2608 | 64    |
| H(8A) | 4461 | 3239 | -1587 | 63    |
| H(8B) | 4733 | 3006 | -2656 | 63    |
| H(9A) | 3688 | 4625 | -2964 | 59    |
| H(9B) | 4731 | 4938 | -3027 | 59    |
